# Supplementary material
Source: Springer Nature journal article supplement (https://www.springermedizin.de/resource/supplementary/12993_2007_142_MOESM7_ESM.pdf/9617294)

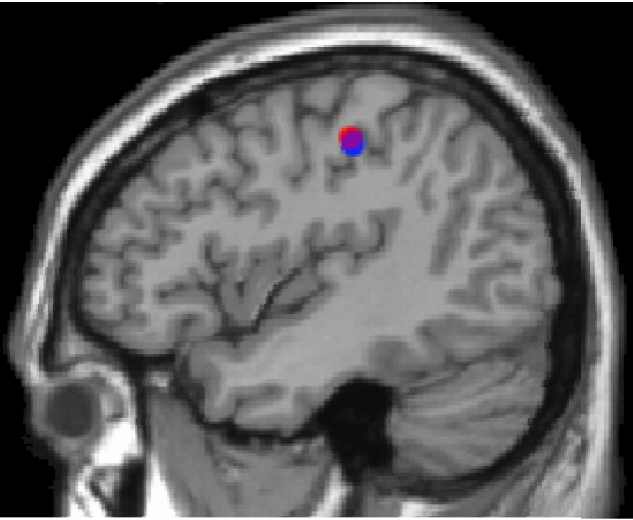

Supplement: MOESM7 [file 9617294]
